1     **Cryo-EM structure of the yeast TREX complex and coordination with**  
2                                   **the SR-like protein Gbp2**

3  
4  
5  
6  
7  
8  
9

Yihu Xie<sup>a,\*</sup>, Bradley P. Clarke<sup>a</sup>, Yong Joon Kim<sup>b,c</sup>, Austin L. Ivey<sup>a</sup>, Pate S. Hill<sup>a</sup>, Yi Shi<sup>b,c</sup>,  
and Yi Ren<sup>a,\*</sup>

10 <sup>a</sup> Department of Biochemistry, Vanderbilt University School of Medicine, Nashville, TN, USA;

11 <sup>b</sup> Department of Cell Biology, University of Pittsburgh, Pittsburgh, PA, USA.

12 <sup>c</sup> Medical Scientist Training Program, University of Pittsburgh and Carnegie Mellon University,  
13 Pittsburgh, PA, USA

14  
15  
16

17 \*Correspondence to: [yihu.xie@vanderbilt.edu](mailto:yihu.xie@vanderbilt.edu) or [yi.ren@vanderbilt.edu](mailto:yi.ren@vanderbilt.edu)

18

19 **Abstract**

20 The evolutionarily conserved TREX complex plays central roles during mRNP  
21 (messenger ribonucleoprotein) maturation and export from the nucleus to the cytoplasm.  
22 In yeast, TREX is composed of the THO sub-complex (Tho2, Hpr1, Tex1, Mft1, and Thp2),  
23 the DEAD box ATPase Sub2, and Yra1. Here we present a 3.7 Å cryo-EM structure of  
24 the yeast THO•Sub2 complex. The structure reveals the intimate assembly of THO  
25 revolving around its largest subunit Tho2. THO stabilizes a semi-open conformation of  
26 the Sub2 ATPase via interactions with Tho2. We show that THO interacts with the SR-  
27 like protein Gbp2 through both the N-terminal domain and RRM domains of Gbp2.  
28 Crosslinking mass spectrometry analysis supports the extensive interactions between  
29 THO and Gbp2, further revealing that RRM domains of Gbp2 are in close proximity to the  
30 C-terminal domain of Tho2. We propose that THO serves as a landing pad to configure  
31 Gbp2 to facilitate its loading onto mRNP.

32



33 **Introduction:**

34 Eukaryotic RNA transcription is carried out in the nucleus by the RNA polymerases.  
35 During an early stage of mRNA transcription, a 5' cap is added to the newly synthesized  
36 mRNA, which is followed by splicing, 3'-end processing and polyadenylation. Nuclear  
37 mRNA biogenesis culminates in their export through the nuclear pore complex to the  
38 cytoplasm. Many protein factors including serine-arginine (SR) proteins associate with  
39 mRNAs to form mature mRNPs for export (Metkar et al., 2018; Singh et al., 2012). The  
40 evolutionarily conserved TRanscript-EXport (TREX) complex plays key roles in the highly  
41 coordinated mRNP assembly and export (Carmody & Wente, 2009; Chavez et al., 2000;  
42 Luo et al., 2001; Strasser & Hurt, 2001; Strasser et al., 2002; Viphakone et al., 2019; Xie  
43 & Ren, 2019; Zhou et al., 2000). TREX is recruited to actively transcribed genes (Cheng  
44 et al., 2006; Masuda et al., 2005; Strasser et al., 2002) and impacts transcription  
45 especially during elongation (Dominguez-Sanchez et al., 2011; Y. Zhang et al., 2016).

46  
47 The C-terminal domain of the largest subunit of RNA Pol II is highly phosphorylated on  
48 the heptapeptide repeats (YSPTSPS) at the Serine 2 position during the elongation phase  
49 of the transcription cycle (Hsin & Manley, 2012). Serine 2 phosphorylation coordinates  
50 loading of co-transcriptional 3' end processing factors to the transcription machinery (Ahn  
51 et al., 2004). In yeast, the primary RNA Pol II CTD Ser2 kinase is the CTDK-1 complex  
52 (Cho et al., 2001; Sterner et al., 1995; Wood & Shilatifard, 2006). Growing evidence links  
53 the function of TREX and transcriptional CDKs. The yeast TREX component Mft1  
54 interacts genetically with CTDK-1 (Hurt et al., 2004). In addition to their roles during  
55 transcription elongation, TREX and CTDK-1 both influence mRNA 3'-end processing and

56 polyadenylation (Ahn et al., 2004; Rougemaille et al., 2008; Saguez et al., 2008). In  
57 humans, the transcriptional kinases are more divergent, at least CDK11, CDK12, and  
58 CDK13 are shown to phosphorylate Ser2 on Pol II CTD, all of which have been  
59 recognized as tumor suppressors (Cao et al., 2014; Parua & Fisher, 2020). TREX and  
60 CDK11 have been shown to interact in human cells and play roles in regulating HIV  
61 mRNA 3' end Processing (Pak et al., 2015).

62

63 The coordination of TREX and CTDK-1 is largely unknown. Several lines of evidence  
64 suggest that a group of shuttling SR proteins could serve as the link for THO and CTDK-  
65 1. SR proteins are well recognized as splicing factors, but they also play important roles  
66 in coordinating transcription and mRNA export (Reed & Cheng, 2005). In yeast, there are  
67 three shuttling SR proteins, Gbp2, Hrb1, and Npl3, which play roles in mRNA export by  
68 interacting with the mRNA export receptor Mex67•Mtr2 (Hackmann et al., 2014). In  
69 humans, three SR proteins, SRSF1, SRSF3, SRSF7 also shuttle between the nucleus  
70 and the cytoplasm to facilitate mRNA export by serving as adaptors for the human  
71 ortholog of Mex67•Mtr2, the NXF1•NXT1 complex (Huang et al., 2003; Huang & Steitz,  
72 2005; Muller-McNicoll et al., 2016).

73

74 In yeast cells, TAP-tagged Gbp2 and Hrb1 were shown to associate with the CTDK-1  
75 complex (Hurt et al., 2004). Consistent with this observation, using purified recombinant  
76 proteins, we recently showed that Gbp2 RRM domains are sufficient to interact with  
77 CTDK-1, involving the N-terminal RS domain in its Ctk1 kinase subunit (Xie et al., 2020).  
78 We also found that there is a synthetic growth defect when both CTK1 and GBP2 are

79 knocked out in yeast. The physical and functional interactions between Gbp2 and CTDK-  
80 1 provide a link between Gbp2 function and the transcription machinery. Interestingly, in  
81 humans, CDK11 directly interacts with SRSF7 (Hu et al., 2003), and together with TREX,  
82 all are implicated in HIV-1 mRNA 3' end processing (Pak et al., 2015; Valente et al., 2009).  
83 Among the three yeast shuttling SR-like proteins, Gbp2 and Hrb1, but not Npl3 have been  
84 shown to rely on the THO components Hpr1 and Mft1 to load onto mRNPs (Hacker &  
85 Krebber, 2004). The different requirements could stem from an interaction between THO  
86 and Gbp2 and Hrb1, but not Npl3 (Hurt et al., 2004; Martinez-Lumbreras et al., 2016).  
87  
88 Despite extensive studies, how TREX, SR proteins, and CTDK-1 coordinately function  
89 during mRNA biogenesis is still not clear. To elucidate the molecular mechanisms, we  
90 conducted biochemical and structural studies on the yeast TREX complex and Gbp2.  
91 Yeast TREX is a ~470 kDa protein complex comprised of the pentameric THO sub-  
92 complex (Tho2, Hpr1, Tex1, Mft1, and Thp2), the DEAD box ATPase Sub2, and Yra1.  
93 Thus far structural understanding of the TREX complex has been limited to low resolution  
94 structures (Pena et al., 2012; Ren et al., 2017). Here we present a 3.7 Å cryo-EM structure  
95 of the yeast THO•Sub2 complex to reveal the molecular details of the THO complex  
96 assembly and the THO-Sub2 interactions. We demonstrate direct binding between THO  
97 and Gbp2 using recombinant proteins and dissect their mode of interaction using *in vitro*  
98 binding studies and crosslinking mass spectrometry (XL-MS) analysis of the THO-Gbp2  
99 complex. Together, we propose that TREX serves as a landing pad to configure the multi-  
100 domain Gbp2 and facilitate its loading onto the mRNP.

101

## 102 **Results and Discussion**

### 103 **THO directly interacts with the SR-like protein Gbp2**

104 We began by testing the interaction between the THO complex and Gbp2 using purified  
105 recombinant proteins. The ~400 kDa THO complex consisting of full-length Tho2, Hpr1,  
106 Tex1, Mft1, and Thp2 subunits (denoted by THO-FL, Figure 1A) was expressed in insect  
107 cells. Full-length Gbp2 was expressed in insect cells with an N-terminal GST-tag. Using  
108 GST pull down assays, we show that Gbp2 directly interacts with THO-FL (Figure 1B).  
109 We next tested the binding of Gbp2 to a THO core complex (denoted by THO\*, Figure  
110 1A) that contains the ordered regions of all THO's five subunits. We found that THO\* is  
111 capable of binding to Gbp2, but with reduced interaction compared to THO-FL (Figure  
112 1B). These results suggest that multiple regions in THO are involved in Gbp2 recognition,  
113 including both the THO core and the potentially flexible regions that are truncated in THO\*.

114

115 We next attempted to dissect the domains in Gbp2 that are involved in THO interaction.  
116 Gbp2 contains an N-terminal RS domain (NTE) followed by three tandem RRM domains,  
117 RRM1, RRM2, and RRM3 (Figure 1A). RRM1 and RRM2 domains are capable of binding  
118 to RNA. RRM3 was shown to recognize THO (Martinez-Lumbreras et al., 2016).  
119 Interestingly, we found that Gbp2 without RRM3 still binds to THO (Figure 1C). On the  
120 other hand, deletion of the N-terminal RS domain of Gbp2 substantially reduced THO  
121 interaction, suggesting that the Gbp2 RS domain is required for stable binding to THO.

122

123 Together, our binding studies indicate that THO-Gbp2 interaction involves multiple  
124 domains from both THO and Gbp2. To provide insights into the underlying molecular

125 mechanisms of the THO-Gbp2 recognition, we take an integrative approach combining  
126 cryo-EM structure determination of the THO\* core complex and XL-MS analysis of the  
127 THO-FL interaction with Gbp2.

128

### 129 **Cryo-EM structure of the THO\*•Sub2 complex at 3.7 Å resolution**

130 The THO complex is an integrated structural and functional unit that regulates the activity  
131 of Sub2. We previously determined a THO•Sub2 crystal structure at 6.0 Å resolution (Ren  
132 et al., 2017). Here, we carried out single particle cryo-EM studies on THO\*•Sub2. For  
133 cryo-EM sample preparation, the THO\*•Sub2 complex was subjected to crosslinking with  
134 glutaraldehyde to obtain a more homogeneous sample. We found that THO\*•Sub2 forms  
135 a higher ordered assembly composed of four THO\*•Sub2 protomers (Figure 2-figure  
136 supplement 1). This tetrameric assembly has a two-fold symmetry, and it correlates with  
137 the asymmetric unit content in our previously determined THO•Sub2 crystal structure.  
138 Two of the four THO\*•Sub2 protomers are well ordered, whereas the peripheral two  
139 protomers are significantly more flexible. We observed an “arch” and a “bridge” that  
140 connect a “rigid” THO\*•Sub2 protomer and a “mobile” protomer (Figure 2-figure  
141 supplement 1D). Our observations suggest that these two protomers are likely  
142 components of the functional assembly observed in THO complex isolated from yeast  
143 cells (Pena et al., 2012), which is also consistent with the recently published THO•Sub2  
144 structure (Schuller et al., 2020). Details of these features at the THO-THO dimer interface  
145 will be discussed in the later section of our XL-MS studies. For obtaining the best quality  
146 map for model building, the THO\*•Sub2 protomer was extracted from the most ordered  
147 two copies and refined to an overall resolution at 3.7 Å (Figure 2-figure supplement 1).

148 The electron density map allows us to build an atomic model of the THO complex de novo  
149 (Figure 2A and Figure 2-figure supplement 2). The THO model contains two thousand  
150 residues with 90% assigned residue register. Sub2 was modeled using our previously  
151 determined crystal structure (Ren et al., 2017). By having the resolution to build an atomic  
152 model, we now reveal the molecular details of the structural core of THO and its  
153 interaction with Sub2.

154

155 The structure of the THO complex reveals intimate folding of the five subunits (Figure 2B  
156 and Figure 2-figure supplement 3). Tho2, the largest subunit spanning the entire length  
157 of the elongated THO, plays a critical role in THO assembly. Tho2 can be dissected as  
158 “head”, “neck”, and “trunk” sections. The Tho2 “head” contains an N-terminal helical  
159 bundle that clusters with the N-termini of Hpr1, Mft1, and Thp2. Tho2 “neck” is comprised  
160 of a helix followed by a loop. The “neck” is embraced by a bi-lobed Hpr1 (lobe A and lobe  
161 B). Tho2 “trunk” folds into an alpha solenoid structure, which binds the Tex1  $\beta$ -propeller  
162 at its center and stabilizes a semi-open Sub2 ATPase at its C-terminal end. An extended  
163 region at Hpr1 C-terminal region forms a “belt” lining the Tho2 “trunk”.

164

### 165 **Assembly of the THO•Sub2 complex**

166 Tho2 is the main scaffold upon which other THO constituents assemble. Tho2 features a  
167 total contact area of  $\sim 9000 \text{ \AA}^2$  with the other four THO subunits. Tho2 “head” domain  
168 binds to a four helix bundle, formed by two pairs of anti-parallel helices contributed by  
169 Mft1 and Thp2, respectively (Figure 3A). Tho2 “head” and the helix in its “neck” sandwich  
170 the very N-terminal helix of Mft1 (residues 6-17). The opposite side of the Mft1/Thp2 four

171 helix bundle runs in parallel with Hpr1 lobe A (residues 1-230). The Tho2 “neck”,  
172 particularly the loop (residues 167-179), is embraced by the Hpr1 lobe A and lobe B  
173 (residues 250-490) (Figure 3B). Although the “neck” is largely buried, it contains multiple  
174 hydrophilic residues including K171, N173 and E177. Tho2 and Hpr1 residues at this  
175 interface are highly conserved from yeast to human (Figure 2-figure supplement 3).

176

177 The “trunk” of Tho2 (residues 180 to 1200) forms an alpha-solenoid. Hpr1 “belt” contains  
178 residue assignment from residues 491 to 535 (Figure 3C). It starts from the beginning of  
179 the Tho2 “trunk”, featuring aromatic residues at the interface including F511, F515, F518,  
180 and W532, and likely extends further to the C-terminus of Tho2 “trunk” as evidenced by  
181 our XL-MS studies discussed later. The seven-bladed Tex1  $\beta$ -propeller sits at the center  
182 of the Tho2 “trunk” via blade 4 and 5 (Figure 3D). The loops connecting blade 4/5 (4D5A)  
183 and 5/6 (5D6A), as well as the 5BC loop within blade 5 contact a pair of Tho2 helices  
184 (residues 626-666), whose opposite side binds to the C-terminal RecA domain of Sub2  
185 (Sub2-C). This Tho2-Tex1 interaction is conserved from yeast to human based on the  
186 sequence homology (Figure 2-figure supplement 3). In addition, a prominent extension  
187 from Tho2 is projected outward perpendicular to the Tho2 “trunk”. The C-terminal part of  
188 this extension (residues 464-485) forms a hairpin that winds through the bottom face of  
189 the Tex1  $\beta$ -propeller. This additional Tho2-Tex1 binding mode is likely a yeast specific  
190 mechanism as human and other metazoan THOs lack this extension (Figure 2-figure  
191 supplement 3).

192

193 Regulation of the enzymatic activity of the DEAD-box ATPase is vital to the stepwise  
194 remodeling reactions mediated by the TREX complex (Xie & Ren, 2019). We previously  
195 showed that THO stimulates the ATPase activity of Sub2 (Ren et al., 2017). The cryo-EM  
196 structure provides new insights into the molecular details of their interaction. Overall, THO  
197 stabilizes a semi-open conformation of Sub2 by interacting with both RecA domains  
198 (Sub2-N and Sub2-C). Comparison of the cryo-EM structure and our previous THO•Sub2  
199 crystal structure shows that these two structures are in excellent agreement (Figure 3-  
200 figure supplement 1). The cryo-EM structure reveals the atomic details of the THO-Sub2  
201 interactions at the Sub2-C interface (Figure 3E). Sub2-C makes contacts with two pairs  
202 of Tho2 helices (residues 625-695). The Sub2 loop consisting of residues 304-308 is  
203 situated at the center of the interface featuring electrostatic interactions via E305 and  
204 N307. In addition, another Sub2 loop consisting of residues 355-358 makes critical  
205 contacts via F355 and R358. The importance of this loop is evidenced by our previous  
206 mutagenesis studies that show the ATPase activity of Sub2 mutant E356A/K357A/R358A  
207 cannot be activated by THO (Ren et al., 2017). This Sub2 activation mechanism is a  
208 conserved mechanism shared by several other DEAD-box proteins including Dbp5 which  
209 functions at the terminal step of nuclear mRNA export at the cytoplasmic side of the  
210 nuclear pore complex (Folkmann et al., 2011; Mathys et al., 2014; Montpetit et al., 2011;  
211 Schutz et al., 2008).

212

### 213 **XL-MS analysis of the THO•Gbp2 complex**

214 The THO complex contains a significant amount of potentially flexible regions including  
215 ~400 residues at the Tho2 C-terminal end and ~150 residues at the Hpr1 C-terminal end.



216 These flexible regions are presumably not suitable for structural studies. Our binding  
217 studies show that these flexible regions are involved in Gbp2 recognition (Figure 1B). To  
218 gain further insights into the THO complex arrangement and the THO-Gbp2 interaction,  
219 we took a XL-MS approach (Chait et al., 2016; Leitner et al., 2016; Yu & Huang, 2018) to  
220 analyze the complex between THO-FL and Gbp2. We used both EDC and DSS, a  
221 carboxyl and amine-reactive crosslinker and an amine specific crosslinker that crosslink  
222 residues with C $\alpha$ -C $\alpha$  distance less than 17 Å and 30 Å, respectively (Kim et al., 2018; Shi  
223 et al., 2014). We obtained a total of 200 unique EDC crosslinks, of which 69 were  
224 interprotein crosslinks including 9 crosslinks between Tho2 and Gbp2. We also obtained  
225 a total of 133 unique DSS crosslinks to complement the EDC crosslink data, with 53 of  
226 these crosslinks being interprotein crosslinks. (Figure 4A, Figure 4A-figure supplement 1,  
227 and Table 2). The crosslinking data is highly consistent with the THO structure (Figure 4-  
228 figure supplement 1B and 1C). 91% and 100% of the EDC and DSS crosslinks that can  
229 be mapped to the structure fall within the expected distance restraint.

230

231 Crosslinks between THO subunits provide insights into the C-terminal domain of THO  
232 (Tho2-CTD, residues 1200-1597) downstream of the “trunk” domain and the role it plays  
233 on the arrangement of the THO-THO dimer. The Tho2-CTD contains a “bridge” that  
234 connects THO to the neighboring THO molecule as indicated by our cryo-EM density map  
235 (Figure 4B, Figure 2-figure supplement 1). Comparison with the recently published THO-  
236 Sub2 structure reveals that the bridge starts at Tho2 residue 1200 (Schuller et al., 2020).  
237 The “bridge” is followed by a structured segment, as suggested by the clustered  
238 crosslinking between Tho2 (residues 1260 to 1369) and the Hpr1 lobe B (E297, D434,

239 K462, and K467) as well as Mft1 D129 (Figure 4B). In line with our observation, Tho2  
240 (residues 1279-1405) was shown to form a rigid core through proteolysis and it folds into  
241 a helical structure as indicated by CD spectra (Pena et al., 2012). Importantly, crosslinking  
242 involving the structured segment indicates that the Tho2-CTD crosses over to the  
243 neighboring THO near its Hpr1 lobe B. The structured segment is followed by a highly  
244 flexible tail (residues ~1400-1597), as this region crosslinks to spatially separated  
245 residues. For example, Tho2 K1576 crosslinks to both Hpr1 lobe B (E297 and D434) and  
246 Tex1 (D341). In support of the flexibility of the Tho2 tail, a previous study showed that  
247 Tho2 (1411-1530) was highly sensitive to trypsin digestion (Pena et al., 2012). Our XL-  
248 MS data further supports the observed THO-THO dimer interface at the “arch”, which is  
249 composed of Mft1 and Thp2 from two THO molecules (Schuller et al., 2020). We identified  
250 multiple crosslinks involving the “bulge” (Mft1, residues 142-196) including Mft1-  
251 K182/Tho2-K1103, Mft1-K165/Tho2-K967, Mft1-K170/Tho2-K967, and Mft1-K174/Tho2-  
252 K967 (Figure 2-figure supplement 1D and Table 2). Structural comparison of our cryo-EM  
253 structure and the recently published structure reveals significant flexibility in the relative  
254 orientation between two THO molecules (Figure 4-figure supplement 2) (Schuller et al.,  
255 2020). Of note, as the dimerization of THO is asymmetric, the “bridge” is only observed  
256 at the proximal side of the THO dimer. It is conceivable that the Tho2-CTD will exhibit  
257 more significant flexibility at the distal side of the THO dimer. Our data also provide  
258 insights into the arrangement of the Tex1 C-terminal tail (residues 367-422) and Hpr1-  
259 CTD (residues 600-752) (Figure 4-figure supplement 2). The extensive crosslinks  
260 observed between Tho2-CTD and Hpr1-CTD suggests that they are spatially close to  
261 each other and are likely localized in between two THO molecules. Together, XL-MS

262 results provide critical insights into the regions in THO that are not visible in the cryo-EM  
263 structures.

264

265 Crosslinking between Tho2 and Gbp2 indicates that Tho2-CTD is in close proximity to all  
266 three Gbp2 RRM domains (Figure 4A and 4C). Each of the three RRM domains crosslinks  
267 to the structured segment in Tho2-CTD: RRM1-K190 to Tho2-K1349, RRM2-E241 to  
268 Tho2-K1250, and RRM3-D367 to Tho2-K1335. These results suggest that Gbp2 is  
269 localized in between two THO molecules near Hpr1 lobe B, as these involved Tho2  
270 residues (K1250 and K1335) are crosslinked to Hpr1 lobe B (Figure 4B). Our data also  
271 show that each RRM domain crosslinks to the highly flexible tail in Tho2-CTD. It is  
272 possible that, in the presence of Gbp2, the Tho2 tail may assume a more specific  
273 conformation.

274

275 Our XL-MS results (Figure 4C), together with the *in vitro* binding studies (Figure 1B and  
276 1C), demonstrate that Tho2-CTD contributes to Gbp2 interaction. The C-terminal domain  
277 of Tho2 also binds to RNA/DNA (Pena, 2012). The function of Tho2-CTD *in vivo* was  
278 supported by the growth defect of *tho2-ΔCTD* yeast strains (Pena et al., 2012).  
279 Importantly, the synthetic growth defect of *tho2-ΔCTD* and *Δgbp2* strains highlights their  
280 functional links (Martinez-Lumbreras et al., 2016).

281

282 As both Gbp2 and Sub2 bind to the C-terminal region of Tho2, we next asked whether  
283 Gbp2 and Sub2 can associate with the THO complex together. GST-Gbp2 was used to  
284 pull down THO in the presence of Sub2. We found that GST-Gbp2 is able to pull down

285 both THO and Sub2 (Figure 4D). In addition, THO and Sub2 appear to be in a  
286 stoichiometric amount relative to each other. Our results suggest that THO, Sub2, and  
287 Gbp2 can form a THO•Sub2•Gbp2 complex, and therefore Gbp2 could function together  
288 with the TREX complex during nuclear mRNP maturation.

289

## 290 **Working model for coordinated function of TREX and Gbp2**

291 Together with our recent characterization of Gbp2 interaction with the RNA Pol II Ser2  
292 kinase CTDK-1 complex, we propose a working model for the coordinated function  
293 between TREX, Gbp2, and CTDK-1 (Figure 5). Gbp2 interaction with CTDK-1 provides  
294 a means to associate with the transcription machinery (Hurt et al., 2004; Xie et al., 2020).  
295 We envision that TREX and Gbp2 function coordinately during nuclear mRNP maturation  
296 and surveillance. During transcription, faulty assembly of mRNPs is a threat to genomic  
297 stability. If the defective mRNPs persist, they need to be sensed by a surveillance system  
298 and degraded. In yeast, Gbp2 and Hrb1 were shown to play key roles in mRNP  
299 surveillance (Hackmann et al., 2014). Interactions between Gbp2 and Mex67 for export  
300 and between Gbp2 and Mtr4 for degradation through the RNA exosome complex are  
301 mutually exclusive. TREX travels with the transcription machinery (Meinel et al., 2013)  
302 and its function in mRNP assembly is well documented. In THO/Sub2 mutant yeast cells,  
303 mRNP assembly is defective and faulty mRNPs cannot be degraded efficiently, which  
304 leads to the formation of heavy chromatin (Rougemaille et al., 2008; Saguez et al., 2008).  
305 In humans, depletion of TREX complex components leads to R-loop accumulation,  
306 transcriptional elongation defects, and trapped mRNP in nuclear speckles. (Dias et al.,  
307 2010; Dominguez-Sanchez et al., 2011; Perez-Calero et al., 2020; Wang et al., 2018).

308 The extensive interactions between THO and Gbp2 suggest that THO could serve as a  
309 landing pad for Gbp2 loading onto mRNPs to function as a key surveillance factor during  
310 mRNP maturation. Interestingly, in human cells, TREX was shown to interact with multiple  
311 domains of the mRNP export receptor NXF1•NXT1 to facilitate its loading onto mRNPs  
312 (Viphakone et al., 2019). Given that Gbp2 interacts with the yeast export receptor  
313 Mex67•Mtr2 (Hackmann, 2014), the interplay between TREX, Gbp2, and Mex67•Mtr2  
314 during mRNP biogenesis warrants further study.  
315

## 316 **Methods**

### 317 **Plasmids and proteins**

318 Both THO-FL and the THO\* core complex were expressed in High-Five insect cells by  
319 coinfection of recombinant baculoviruses. THO-FL contains full length *S. cerevisiae* Tho2  
320 (residues 1-1597), Hpr1 (residues 1-752), Tex1 (residues 1-422), Mft1 (residues 1-392),  
321 and Thp2 (residues 1-261) subunits and the former four subunits each contains a TEV  
322 cleavable N-terminal His tag. The THO\* complex contains *S. cerevisiae* Tho2 (residues  
323 1-1257), Hpr1 (residues 1-603), Mft1 (residues 1-256), full length Thp2, and *S. bayanas*  
324 Tex1 (residues 1-380) with Tho2 and Hpr1 each containing a TEV cleavable N-terminal  
325 His tag. High-Five cells were harvested 48 hr after infection. The cells were sonicated in  
326 a lysis buffer containing 50 mM Tris pH 8.0, 300 mM NaCl, 10 mM imidazole, 1 mM PMSF,  
327 5 mg/L aprotinin, 1 mg/L pepstatin, 1 mg/L leupeptin, and 0.5 mM TCEP. THO complexes  
328 were purified by Ni affinity chromatography, followed by TEV digestion to remove His tags.  
329 The proteins were then purified on a mono Q column (GE Healthcare) and subjected to  
330 further size exclusion purification with a Superose 6 column (GE Healthcare) in 10 mM  
331 Tris pH 8.0, 150 mM NaCl, and 0.5 mM TCEP.

332

333 GST tagged Gbp2 (residues 1-427) and Gbp2 $\Delta$ RRM3 (residues 1-316) were expressed  
334 in High-Five cells. Cells were lysed in the same condition as the THO complexes. The  
335 GST tagged Gbp2 proteins were purified using glutathione sepharose 4B resin (GE  
336 Healthcare) followed by size exclusion chromatography using a Superdex 200 column  
337 (GE Healthcare) in 10 mM Tris pH 8.0, 300 mM NaCl, and 0.5 mM TCEP.

338

339 Sub2 and Gbp2 $\Delta$ N (residues 107-427) were expressed in Rosetta *E. coli* cells  
340 (Stratagene) with an N-terminal TEV cleavable GST tag. Protein expression was induced  
341 at an OD<sub>600</sub> of 1.0 with 0.5 mM IPTG at 20 °C for 16 hrs. Cells were lysed in the same  
342 lysis buffer as mentioned above. Proteins were first purified using glutathione sepharose  
343 4B resin. For Sub2, the GST tag was removed by TEV, and the protein was purified on a  
344 mono Q column. Untagged Sub2 and GST-Gbp2 $\Delta$ N were further purified on a Superdex  
345 200 column in 10 mM Tris pH 8.0, 150 mM NaCl, and 0.5 mM TCEP.

346

347 All purified proteins were concentrated, flash frozen in liquid nitrogen, and stored at -80°C.

348

#### 349 **Cryo-EM Sample preparation and data collection**

350 Purified THO\* and Sub2 were first buffer exchanged to 10 mM HEPES pH 7.0, 100 mM  
351 potassium acetate, and 0.5 mM TCEP. THO\* was incubated with 3-fold molar excess of  
352 Sub2 in the presence of 0.05% glutaraldehyde for 30 min at RT. Crosslinking was  
353 quenched with 0.1 M Tris pH 8.0 and the sample was concentrated to 0.5 mg/mL. 1.5  $\mu$   
354 of THO\*•Sub2 was applied to a glow-discharged UltrAuFoil R 1.2/1.3 grids (Quantifoil).  
355 Grids were blotted for 3 s with a blotting force of 3 and 100% humidity at 22 °C and  
356 plunged into liquid ethane using an FEI Vitrobot Mark IV (Thermo Fisher).

357

358 Electron micrographs were acquired with a Titan Krios electron microscope (Thermo  
359 Fisher) equipped with a Falcon 3 detector (Thermo Fisher). Movies were collected with  
360 EPU with a calibrated pixel size of 0.681 Å/pixel. A total of 4907 movies were collected

361 with a defocus range from 0.8  $\mu\text{m}$  to 2.0  $\mu\text{m}$ . Description of the cryo-EM data collection  
362 parameters can be found in Table 1.

363

### 364 **Cryo-EM data processing**

365 Motion correction was performed using MotionCor2 (Zheng et al., 2017). The parameters  
366 of the contrast transfer function (CTF) were estimated using Gctf (K. Zhang, 2016). We  
367 initially selected 396 K particles from 4907 micrographs with automatic particle picking in  
368 RELION-3 (Zivanov et al., 2018). The picked particles were binned by 2 and subjected to  
369 reference-free 2D classification. 205 K particles were selected for 3D classification with  
370 C2 symmetry using an initial model generated by EMAN2 (Tang et al., 2007). Each  
371 particle contains four copies of the THO•Sub2 complex with two copies significantly more  
372 flexible than the others. 15 K particles were selected for 3D refinement using a mask  
373 covering the two ordered THO•Sub2 molecules with C2 symmetry. The particles were  
374 then re-extracted at the original pixel size of 0.681  $\text{\AA}/\text{pixel}$  and subjected to Bayesian  
375 polishing, CTF refinement, and 3D refinement. Refinement of the entire four copies of  
376 THO•Sub2 molecules generated a map at 4.80  $\text{\AA}$  resolution. We extracted 30 K  
377 THO•Sub2 protomers from the ordered two copies and refinement using a mask covering  
378 one THO•Sub2 molecule yielded a map of THO•Sub2 at 3.70  $\text{\AA}$  resolution with a  
379 sharpening B factor of 86  $\text{\AA}^2$  as assessed by an FSC threshold of 0.143.

380

### 381 **Model building**

382 The 3.70  $\text{\AA}$  THO•Sub2 map was used for model building in COOT (Emsley et al., 2010).  
383 The five subunit THO complex was built de novo. Individual RecA domains of Sub2 were



384 placed using our previously determined atomic resolution structure (PDB ID 5SUP). The  
385 THO•Sub2 model was subjected to real-space refinement in Phenix (Adams et al., 2010).  
386 The final THO•Sub2 model contains Tho2 (residues 37 to 913, followed by 10 poly-Ala  
387 helices at the C-terminus), Hpr1 (residues 4 to 535), Tex1 (residues 68 to 366), Mft1  
388 (residues 5 to 227), Thp2 (residues 8 to 227), and Sub2. Figures were prepared using  
389 Chimera (Pettersen et al., 2004) or PyMOL (Molecular Graphics System, Schrodinger,  
390 LLC).

391

### 392 **GST pull-down assays**

393 1  $\mu$ M of GST or GST-tagged Gbp2 variants was incubated with 1  $\mu$ M of THO variants or  
394 with 1  $\mu$ M of THO and 2  $\mu$ M of Sub2 as indicated in the binding buffer (20 mM HEPES  
395 pH 7.0, 80 mM NaCl, and 0.5 mM TCEP) at room temperature for 10 min. The reaction  
396 mixtures were then added to ~15  $\mu$ L glutathione resin in an Eppendorf tube and binding  
397 was allowed to proceed at room temperature for 30 min with gentle tapping to mix every  
398 3-5 min. Beads were washed twice with 500  $\mu$ L washing buffer containing 20 mM HEPES  
399 pH 7.0, 80 mM NaCl (for Figure 1B) or 50 mM NaCl (for Figure 1C and Figure 4D), and  
400 0.5 mM TCEP. Bound proteins were eluted with washing buffer supplemented with 20  
401 mM glutathione and analyzed using Coomassie-stained SDS-PAGE gels. The  
402 experiments were repeated three times independently.

403

### 404 **Crosslinking mass spectrometry analysis**

405 For EDC crosslinking, 1  $\mu$ M of THO-FL and 1  $\mu$ M of GST-Gbp2 were incubated at 10 mM  
406 HEPES pH 7.0, 105 mM NaCl, 0.5 mM TCEP in the presence of 20 mM EDC and 0.5 mM

407 sulfo-DHS at room temperature for 40 min. The reaction was quenched at room  
408 temperature for 20 min by adding Tris pH 8.0 and  $\beta$ -mercaptoethanol to a final  
409 concentration of 50 mM and 20 mM, respectively. DSS crosslinking was performed in the  
410 same conditions except that 0.5 mM DSS was used and only Tris pH 8.0 was used for  
411 quenching the reaction.

412

413 The DSS and EDC cross-linked samples were directly processed for in-solution Trypsin  
414 and Lys-C digestion. The samples were reduced with 5 mM DTT and 5 mM TCEP in 8M  
415 urea buffer (50 mM Ammonium bicarbonate), and were then incubated with 30mM  
416 iodoacetamide at room temperature for 30 minutes in the dark. 30-45  $\mu$ g of the purified  
417 complex was digested with Trypsin and Lys-C using a 1:100 ratio for each protease upon  
418 diluting the sample to 1 M urea. The proteolysis reaction occurred overnight (12-16 hours)  
419 at 37°C. After overnight digestion with trypsin, the complex was digested with an  
420 additional 1:100 ratio of trypsin at 37°C for 2 hours. The resulting mixture was acidified,  
421 desalted by using a C18 cartridge (Sep-Pak, Waters).

422

423 1-2  $\mu$ g of the trypsin digested crosslinked complex was analyzed with a nano-LC 1200  
424 that is coupled online with a Q Exactive™ HF-X Hybrid Quadrupole Orbitrap™ mass  
425 spectrometer (Thermo Fisher) (Xiang, Nambulli, et al., 2020; Xiang, Shen, et al., 2020).  
426 Briefly, desalted peptides were loaded onto a Picochip column (C18, 1.9  $\mu$ m particle size,  
427 200 Å pore size, 50  $\mu$ m  $\times$  25 cm; New Objective) and eluted using a 60-min liquid  
428 chromatography gradient (5% B–8% B, 0–2 min; 8% B–40% B, 2-50 min; 40%B–100%  
429 B, 50-60 min; mobile phase A consisted of 0.1% formic acid (FA), and mobile phase B

430 consisted of 0.1% FA in 80% acetonitrile). The flow rate was ~350 nl/min. The QE HF-X  
431 instrument was operated in the data-dependent mode, where the top 6 most abundant  
432 ions (mass range 350 – 2,000, charge state 4 - 8) were fragmented by high-energy  
433 collisional dissociation (HCD). The target resolution was 120,000 for MS and 15,000 for  
434 tandem MS (MS/MS) analyses. The quadrupole isolation window was 1.6 Th, and the  
435 maximum injection time for MS/MS was set at 300 ms.

436

437 After the MS analysis, the data was searched by pLink2 for the identification of cross-  
438 linked peptides (Chen et al., 2019). The mass accuracy was specified as 10 and 20 p.p.m.  
439 for MS and MS/MS, respectively. Other search parameters included cysteine  
440 carbamidomethylation as a fixed modification and methionine oxidation as a variable  
441 modification. A maximum of three trypsin missed-cleavage sites were allowed. The  
442 crosslink spectra were then manually checked to remove potential false-positive  
443 identifications as previously described (Xiang, Shen, et al., 2020). The crosslinking data  
444 was analyzed by CX-Circos (<http://cx-circos.net>). The distance distribution of the  
445 crosslinks onto the THO structure was performed with Xlink Analyzer (Kosinski et al.,  
446 2015).

447

448 **Acknowledgments**

449 We thank Scott Collier and Melissa Chambers at the Center for Structural Biology Cryo-  
450 EM Facility at Vanderbilt University for assistance in Cryo-EM data collection. We thank  
451 members of the Wentz laboratory for discussions. This work was supported by NIGMS  
452 grants R35 GM133743 to Y.R. and GM137905 to Y.S., and funds from Vanderbilt  
453 University School of Medicine to Y.R.. BPC is supported by NIH/NCI training grant  
454 T32CA119925.

455

456 **Data availability**

457 The cryo-EM density maps will be deposited in the Electron Microscopy Data Bank. The  
458 coordinates of the THO•Sub2 complex will be deposited in the Protein Data Bank.

459

460 **Competing interests**

461 The authors declare no competing interests.

## 462 References

- 463 Adams, P. D., Afonine, P. V., Bunkoczi, G., Chen, V. B., Davis, I. W., Echols, N., Headd, J. J.,  
464 Hung, L. W., Kapral, G. J., Grosse-Kunstleve, R. W., McCoy, A. J., Moriarty, N. W.,  
465 Oeffner, R., Read, R. J., Richardson, D. C., Richardson, J. S., Terwilliger, T. C., & Zwart,  
466 P. H. (2010). PHENIX: a comprehensive Python-based system for macromolecular  
467 structure solution. *Acta Crystallogr D Biol Crystallogr*, *66*(Pt 2), 213-221.  
468 doi:10.1107/S0907444909052925
- 469 Ahn, S. H., Kim, M., & Buratowski, S. (2004). Phosphorylation of serine 2 within the RNA  
470 polymerase II C-terminal domain couples transcription and 3' end processing. *Mol Cell*,  
471 *13*(1), 67-76. doi:10.1016/s1097-2765(03)00492-1
- 472 Cao, L., Chen, F., Yang, X., Xu, W., Xie, J., & Yu, L. (2014). Phylogenetic analysis of CDK and  
473 cyclin proteins in premetazoan lineages. *BMC Evol Biol*, *14*, 10. doi:10.1186/1471-2148-  
474 14-10
- 475 Carmody, S. R., & Wenthe, S. R. (2009). mRNA nuclear export at a glance. *J Cell Sci*, *122*(Pt 12),  
476 1933-1937. doi:10.1242/jcs.041236
- 477 Chait, B. T., Cadene, M., Olinares, P. D., Rout, M. P., & Shi, Y. (2016). Revealing Higher Order  
478 Protein Structure Using Mass Spectrometry. *Journal of the American Society for Mass*  
479 *Spectrometry*, *27*(6), 952-965. doi:10.1007/s13361-016-1385-1
- 480 Chavez, S., Beilharz, T., Rondon, A. G., Erdjument-Bromage, H., Tempst, P., Svejstrup, J. Q.,  
481 Lithgow, T., & Aguilera, A. (2000). A protein complex containing Tho2, Hpr1, Mft1 and  
482 a novel protein, Thp2, connects transcription elongation with mitotic recombination in  
483 *Saccharomyces cerevisiae*. *EMBO J*, *19*(21), 5824-5834. doi:10.1093/emboj/19.21.5824
- 484 Chen, Z. L., Meng, J. M., Cao, Y., Yin, J. L., Fang, R. Q., Fan, S. B., Liu, C., Zeng, W. F., Ding,  
485 Y. H., Tan, D., Wu, L., Zhou, W. J., Chi, H., Sun, R. X., Dong, M. Q., & He, S. M. (2019).  
486 A high-speed search engine pLink 2 with systematic evaluation for proteome-scale  
487 identification of cross-linked peptides. *Nat Commun*, *10*(1), 3404. doi:10.1038/s41467-  
488 019-11337-z
- 489 Cheng, H., Dufu, K., Lee, C. S., Hsu, J. L., Dias, A., & Reed, R. (2006). Human mRNA export  
490 machinery recruited to the 5' end of mRNA. *Cell*, *127*(7), 1389-1400.  
491 doi:10.1016/j.cell.2006.10.044
- 492 Cho, E. J., Kobor, M. S., Kim, M., Greenblatt, J., & Buratowski, S. (2001). Opposing effects of  
493 Ctk1 kinase and Fcp1 phosphatase at Ser 2 of the RNA polymerase II C-terminal domain.  
494 *Genes Dev*, *15*(24), 3319-3329. doi:10.1101/gad.935901
- 495 Dias, A. P., Dufu, K., Lei, H., & Reed, R. (2010). A role for TREX components in the release of  
496 spliced mRNA from nuclear speckle domains. *Nat Commun*, *1*, 97.  
497 doi:10.1038/ncomms1103
- 498 Dominguez-Sanchez, M. S., Barroso, S., Gomez-Gonzalez, B., Luna, R., & Aguilera, A. (2011).  
499 Genome instability and transcription elongation impairment in human cells depleted of  
500 THO/TREX. *PLoS Genet*, *7*(12), e1002386. doi:10.1371/journal.pgen.1002386
- 501 Emsley, P., Lohkamp, B., Scott, W. G., & Cowtan, K. (2010). Features and development of Coot.  
502 *Acta Crystallogr D Biol Crystallogr*, *66*(Pt 4), 486-501. doi:10.1107/S0907444910007493
- 503 Folkmann, A. W., Noble, K. N., Cole, C. N., & Wenthe, S. R. (2011). Dbp5, Gle1-IP6 and Nup159:  
504 a working model for mRNP export. *Nucleus*, *2*(6), 540-548. doi:10.4161/nucl.2.6.17881
- 505 Hacker, S., & Krebber, H. (2004). Differential export requirements for shuttling serine/arginine-  
506 type mRNA-binding proteins. *J Biol Chem*, *279*(7), 5049-5052.  
507 doi:10.1074/jbc.C300522200

- 508 Hackmann, A., Wu, H., Schneider, U. M., Meyer, K., Jung, K., & Krebber, H. (2014). Quality  
509 control of spliced mRNAs requires the shuttling SR proteins Gbp2 and Hrb1. *Nat Commun*,  
510 5, 3123. doi:10.1038/ncomms4123
- 511 Hsin, J. P., & Manley, J. L. (2012). The RNA polymerase II CTD coordinates transcription and  
512 RNA processing. *Genes Dev*, 26(19), 2119-2137. doi:10.1101/gad.200303.112
- 513 Hu, D., Mayeda, A., Trembley, J. H., Lahti, J. M., & Kidd, V. J. (2003). CDK11 complexes  
514 promote pre-mRNA splicing. *J Biol Chem*, 278(10), 8623-8629.  
515 doi:10.1074/jbc.M210057200
- 516 Huang, Y., Gattoni, R., Stevenin, J., & Steitz, J. A. (2003). SR splicing factors serve as adapter  
517 proteins for TAP-dependent mRNA export. *Mol Cell*, 11(3), 837-843. doi:10.1016/s1097-  
518 2765(03)00089-3
- 519 Huang, Y., & Steitz, J. A. (2005). SRprises along a messenger's journey. *Mol Cell*, 17(5), 613-615.  
520 doi:10.1016/j.molcel.2005.02.020
- 521 Hurt, E., Luo, M. J., Rother, S., Reed, R., & Strasser, K. (2004). Cotranscriptional recruitment of  
522 the serine-arginine-rich (SR)-like proteins Gbp2 and Hrb1 to nascent mRNA via the TREX  
523 complex. *Proc Natl Acad Sci U S A*, 101(7), 1858-1862. doi:10.1073/pnas.0308663100
- 524 Kim, S. J., Fernandez-Martinez, J., Nudelman, I., Shi, Y., Zhang, W. Z., Raveh, B., Herricks, T.,  
525 Slaughter, B. D., Hogan, J. A., Upla, P., Chemmama, I. E., Pellarin, R., Echeverria, I.,  
526 Shivaraju, M., Chaudhury, A. S., Wang, J. J., Williams, R., Unruh, J. R., Greenberg, C. H.,  
527 Jacobs, E. Y., Yu, Z. H., de la Cruz, M. J., Mironska, R., Stokes, D. L., Aitchison, J. D.,  
528 Jarrold, M. F., Gerton, J. L., Ludtke, S. J., Akey, C. W., Chait, B. T., Sali, A., & Rout, M.  
529 P. (2018). Integrative structure and functional anatomy of a nuclear pore complex. *Nature*,  
530 555(7697), 475-+. doi:10.1038/nature26003
- 531 Kosinski, J., von Appen, A., Ori, A., Karius, K., Muller, C. W., & Beck, M. (2015). Xlink Analyzer:  
532 software for analysis and visualization of cross-linking data in the context of three-  
533 dimensional structures. *J Struct Biol*, 189(3), 177-183. doi:10.1016/j.jsb.2015.01.014
- 534 Leitner, A., Faini, M., Stengel, F., & Aebersold, R. (2016). Crosslinking and Mass Spectrometry:  
535 An Integrated Technology to Understand the Structure and Function of Molecular  
536 Machines. *Trends in Biochemical Sciences*, 41(1), 20-32. doi:10.1016/j.tibs.2015.10.008
- 537 Luo, M. L., Zhou, Z., Magni, K., Christoforides, C., Rappsilber, J., Mann, M., & Reed, R. (2001).  
538 Pre-mRNA splicing and mRNA export linked by direct interactions between UAP56 and  
539 Aly. *Nature*, 413(6856), 644-647. doi:10.1038/35098106
- 540 Martinez-Lumbreras, S., Taverniti, V., Zorrilla, S., Seraphin, B., & Perez-Canadillas, J. M. (2016).  
541 Gbp2 interacts with THO/TREX through a novel type of RRM domain. *Nucleic Acids Res*,  
542 44(1), 437-448. doi:10.1093/nar/gkv1303
- 543 Masuda, S., Das, R., Cheng, H., Hurt, E., Dorman, N., & Reed, R. (2005). Recruitment of the  
544 human TREX complex to mRNA during splicing. *Genes Dev*, 19(13), 1512-1517.  
545 doi:10.1101/gad.1302205
- 546 Mathys, H., Basquin, J., Ozgur, S., Czarnocki-Cieciura, M., Bonneau, F., Aartse, A., Dziembowski,  
547 A., Nowotny, M., Conti, E., & Filipowicz, W. (2014). Structural and biochemical insights  
548 to the role of the CCR4-NOT complex and DDX6 ATPase in microRNA repression. *Mol*  
549 *Cell*, 54(5), 751-765. doi:10.1016/j.molcel.2014.03.036
- 550 Meinel, D. M., Burkert-Kautzsch, C., Kieser, A., O'Duibhir, E., Siebert, M., Mayer, A., Cramer,  
551 P., Soding, J., Holstege, F. C., & Strasser, K. (2013). Recruitment of TREX to the  
552 transcription machinery by its direct binding to the phospho-CTD of RNA polymerase II.  
553 *PLoS Genet*, 9(11), e1003914. doi:10.1371/journal.pgen.1003914



- 554 Metkar, M., Ozadam, H., Lajoie, B. R., Imakaev, M., Mirny, L. A., Dekker, J., & Moore, M. J.  
555 (2018). Higher-Order Organization Principles of Pre-translational mRNPs. *Mol Cell*, *72*(4),  
556 715-726 e713. doi:10.1016/j.molcel.2018.09.012
- 557 Montpetit, B., Thomsen, N. D., Helmke, K. J., Seeliger, M. A., Berger, J. M., & Weis, K. (2011).  
558 A conserved mechanism of DEAD-box ATPase activation by nucleoporins and InsP6 in  
559 mRNA export. *Nature*, *472*(7342), 238-242. doi:10.1038/nature09862
- 560 Muller-McNicoll, M., Botti, V., de Jesus Domingues, A. M., Brandl, H., Schwich, O. D., Steiner,  
561 M. C., Curk, T., Poser, I., Zarnack, K., & Neugebauer, K. M. (2016). SR proteins are NXF1  
562 adaptors that link alternative RNA processing to mRNA export. *Genes Dev*, *30*(5), 553-  
563 566. doi:10.1101/gad.276477.115
- 564 Pak, V., Eifler, T. T., Jager, S., Krogan, N. J., Fujinaga, K., & Peterlin, B. M. (2015). CDK11 in  
565 TREX/THOC Regulates HIV mRNA 3' End Processing. *Cell Host Microbe*, *18*(5), 560-  
566 570. doi:10.1016/j.chom.2015.10.012
- 567 Parua, P. K., & Fisher, R. P. (2020). Dissecting the Pol II transcription cycle and derailing cancer  
568 with CDK inhibitors. *Nat Chem Biol*, *16*(7), 716-724. doi:10.1038/s41589-020-0563-4
- 569 Pena, A., Gewartowski, K., Mroczek, S., Cuellar, J., Szykowska, A., Prokop, A., Czarnocki-  
570 Cieciora, M., Piwowarski, J., Tous, C., Aguilera, A., Carrascosa, J. L., Valpuesta, J. M., &  
571 Dziembowski, A. (2012). Architecture and nucleic acids recognition mechanism of the  
572 THO complex, an mRNP assembly factor. *EMBO J*, *31*(6), 1605-1616.  
573 doi:10.1038/emboj.2012.10
- 574 Perez-Calero, C., Bayona-Feliu, A., Xue, X., Barroso, S. I., Munoz, S., Gonzalez-Basallote, V. M.,  
575 Sung, P., & Aguilera, A. (2020). UAP56/DDX39B is a major cotranscriptional RNA-DNA  
576 helicase that unwinds harmful R loops genome-wide. *Genes Dev*, *34*(13-14), 898-912.  
577 doi:10.1101/gad.336024.119
- 578 Pettersen, E. F., Goddard, T. D., Huang, C. C., Couch, G. S., Greenblatt, D. M., Meng, E. C., &  
579 Ferrin, T. E. (2004). UCSF Chimera--a visualization system for exploratory research and  
580 analysis. *J Comput Chem*, *25*(13), 1605-1612. doi:10.1002/jcc.20084
- 581 Reed, R., & Cheng, H. (2005). TREX, SR proteins and export of mRNA. *Curr Opin Cell Biol*,  
582 *17*(3), 269-273. doi:10.1016/j.ceb.2005.04.011
- 583 Ren, Y., Schmiege, P., & Blobel, G. (2017). Structural and biochemical analyses of the DEAD-  
584 box ATPase Sub2 in association with THO or Yra1. *Elife*, *6*. doi:10.7554/eLife.20070
- 585 Rougemaille, M., Dieppois, G., Kisseleva-Romanova, E., Gudipati, R. K., Lemoine, S., Blugeon,  
586 C., Boulay, J., Jensen, T. H., Stutz, F., Devaux, F., & Libri, D. (2008). THO/Sub2p  
587 functions to coordinate 3'-end processing with gene-nuclear pore association. *Cell*, *135*(2),  
588 308-321. doi:10.1016/j.cell.2008.08.005
- 589 Saguez, C., Schmid, M., Olesen, J. R., Ghazy, M. A., Qu, X., Poulsen, M. B., Nasser, T., Moore,  
590 C., & Jensen, T. H. (2008). Nuclear mRNA surveillance in THO/sub2 mutants is triggered  
591 by inefficient polyadenylation. *Mol Cell*, *31*(1), 91-103. doi:10.1016/j.molcel.2008.04.030
- 592 Schuller, S. K., Schuller, J. M., Prabu, J. R., Baumgartner, M., Bonneau, F., Basquin, J., & Conti,  
593 E. (2020). Structural insights into the nucleic acid remodeling mechanisms of the yeast  
594 THO-Sub2 complex. *Elife*, *9*. doi:10.7554/eLife.61467
- 595 Schutz, P., Bumann, M., Oberholzer, A. E., Bieniossek, C., Trachsel, H., Altmann, M., & Baumann,  
596 U. (2008). Crystal structure of the yeast eIF4A-eIF4G complex: an RNA-helicase  
597 controlled by protein-protein interactions. *Proc Natl Acad Sci U S A*, *105*(28), 9564-9569.  
598 doi:10.1073/pnas.0800418105

- 599 Shi, Y., Fernandez-Martinez, J., Tjioe, E., Pellarin, R., Kim, S. J., Williams, R., Schneidman-  
600 Duhovny, D., Sali, A., Rout, M. P., & Chait, B. T. (2014). Structural characterization by  
601 cross-linking reveals the detailed architecture of a coatomer-related heptameric module  
602 from the nuclear pore complex. *Mol Cell Proteomics*, *13*(11), 2927-2943.  
603 doi:10.1074/mcp.M114.041673
- 604 Singh, G., Kucukural, A., Cenik, C., Leszyk, J. D., Shaffer, S. A., Weng, Z., & Moore, M. J. (2012).  
605 The Cellular EJC Interactome Reveals Higher-Order mRNP Structure and an EJC-SR  
606 Protein Nexus. *Cell*, *151*(4), 915-916. doi:10.1016/j.cell.2012.10.032
- 607 Sterner, D. E., Lee, J. M., Hardin, S. E., & Greenleaf, A. L. (1995). The yeast carboxyl-terminal  
608 repeat domain kinase CTDK-I is a divergent cyclin-cyclin-dependent kinase complex. *Mol*  
609 *Cell Biol*, *15*(10), 5716-5724. doi:10.1128/mcb.15.10.5716
- 610 Strasser, K., & Hurt, E. (2001). Splicing factor Sub2p is required for nuclear mRNA export through  
611 its interaction with Yra1p. *Nature*, *413*(6856), 648-652. doi:10.1038/35098113
- 612 Strasser, K., Masuda, S., Mason, P., Pfannstiel, J., Oppizzi, M., Rodriguez-Navarro, S., Rondon,  
613 A. G., Aguilera, A., Struhl, K., Reed, R., & Hurt, E. (2002). TREX is a conserved complex  
614 coupling transcription with messenger RNA export. *Nature*, *417*(6886), 304-308.  
615 doi:10.1038/nature746
- 616 Tang, G., Peng, L., Baldwin, P. R., Mann, D. S., Jiang, W., Rees, I., & Ludtke, S. J. (2007).  
617 EMAN2: an extensible image processing suite for electron microscopy. *J Struct Biol*,  
618 *157*(1), 38-46. doi:10.1016/j.jsb.2006.05.009
- 619 Valente, S. T., Gilmartin, G. M., Venkatarama, K., Arriagada, G., & Goff, S. P. (2009). HIV-1  
620 mRNA 3' end processing is distinctively regulated by eIF3f, CDK11, and splice factor 9G8.  
621 *Mol Cell*, *36*(2), 279-289. doi:10.1016/j.molcel.2009.10.004
- 622 Viphakone, N., Sudbery, I., Griffith, L., Heath, C. G., Sims, D., & Wilson, S. A. (2019). Co-  
623 transcriptional Loading of RNA Export Factors Shapes the Human Transcriptome. *Mol*  
624 *Cell*, *75*(2), 310-323 e318. doi:10.1016/j.molcel.2019.04.034
- 625 Wang, K., Wang, L., Wang, J., Chen, S., Shi, M., & Cheng, H. (2018). Intronless mRNAs transit  
626 through nuclear speckles to gain export competence. *J Cell Biol*, *217*(11), 3912-3929.  
627 doi:10.1083/jcb.201801184
- 628 Wood, A., & Shilatifard, A. (2006). Bur1/Bur2 and the Ctk complex in yeast: the split personality  
629 of mammalian P-TEFb. *Cell Cycle*, *5*(10), 1066-1068. doi:10.4161/cc.5.10.2769
- 630 Xiang, Y., Nambulli, S., Xiao, Z., Liu, H., Sang, Z., Duprex, W. P., Schneidman-Duhovny, D.,  
631 Zhang, C., & Shi, Y. (2020). Versatile and multivalent nanobodies efficiently neutralize  
632 SARS-CoV-2. *Science*. doi:10.1126/science.abe4747
- 633 Xiang, Y., Shen, Z., & Shi, Y. (2020). Chemical Cross-Linking and Mass Spectrometric Analysis  
634 of the Endogenous Yeast Exosome Complexes. *Methods Mol Biol*, *2062*, 383-400.  
635 doi:10.1007/978-1-4939-9822-7\_18
- 636 Xie, Y., Lord, C. L., Clarke, B. P., Ivey, A. L., S., Hill P., W., McDonald H., Wentz, S. R., & Ren,  
637 Y. (2020). Structure and activation mechanism of the yeast RNA Pol II CTD kinase CTDK-  
638 1 complex. *Proc Natl Acad Sci U S A* (manuscript in press).
- 639 Xie, Y., & Ren, Y. (2019). Mechanisms of nuclear mRNA export: A structural perspective. *Traffic*,  
640 *20*(11), 829-840. doi:10.1111/tra.12691
- 641 Yu, C., & Huang, L. (2018). Cross-Linking Mass Spectrometry: An Emerging Technology for  
642 Interactomics and Structural Biology. *Analytical Chemistry*, *90*(1), 144-165.  
643 doi:10.1021/acs.analchem.7b04431



- 644 Zhang, K. (2016). Gctf: Real-time CTF determination and correction. *J Struct Biol*, *193*(1), 1-12.  
645 doi:10.1016/j.jsb.2015.11.003
- 646 Zhang, Y., French, S. L., Beyer, A. L., & Schneider, D. A. (2016). The Transcription Factor THO  
647 Promotes Transcription Initiation and Elongation by RNA Polymerase I. *J Biol Chem*,  
648 *291*(6), 3010-3018. doi:10.1074/jbc.M115.673442
- 649 Zheng, S. Q., Palovcak, E., Armache, J. P., Verba, K. A., Cheng, Y., & Agard, D. A. (2017).  
650 MotionCor2: anisotropic correction of beam-induced motion for improved cryo-electron  
651 microscopy. *Nat Methods*, *14*(4), 331-332. doi:10.1038/nmeth.4193
- 652 Zhou, Z., Luo, M. J., Straesser, K., Katahira, J., Hurt, E., & Reed, R. (2000). The protein Aly links  
653 pre-messenger-RNA splicing to nuclear export in metazoans. *Nature*, *407*(6802), 401-405.  
654 doi:10.1038/35030160
- 655 Zivanov, J., Nakane, T., Forsberg, B. O., Kimanius, D., Hagen, W. J., Lindahl, E., & Scheres, S.  
656 H. (2018). New tools for automated high-resolution cryo-EM structure determination in  
657 RELION-3. *Elife*, *7*. doi:10.7554/eLife.42166
- 658
- 659

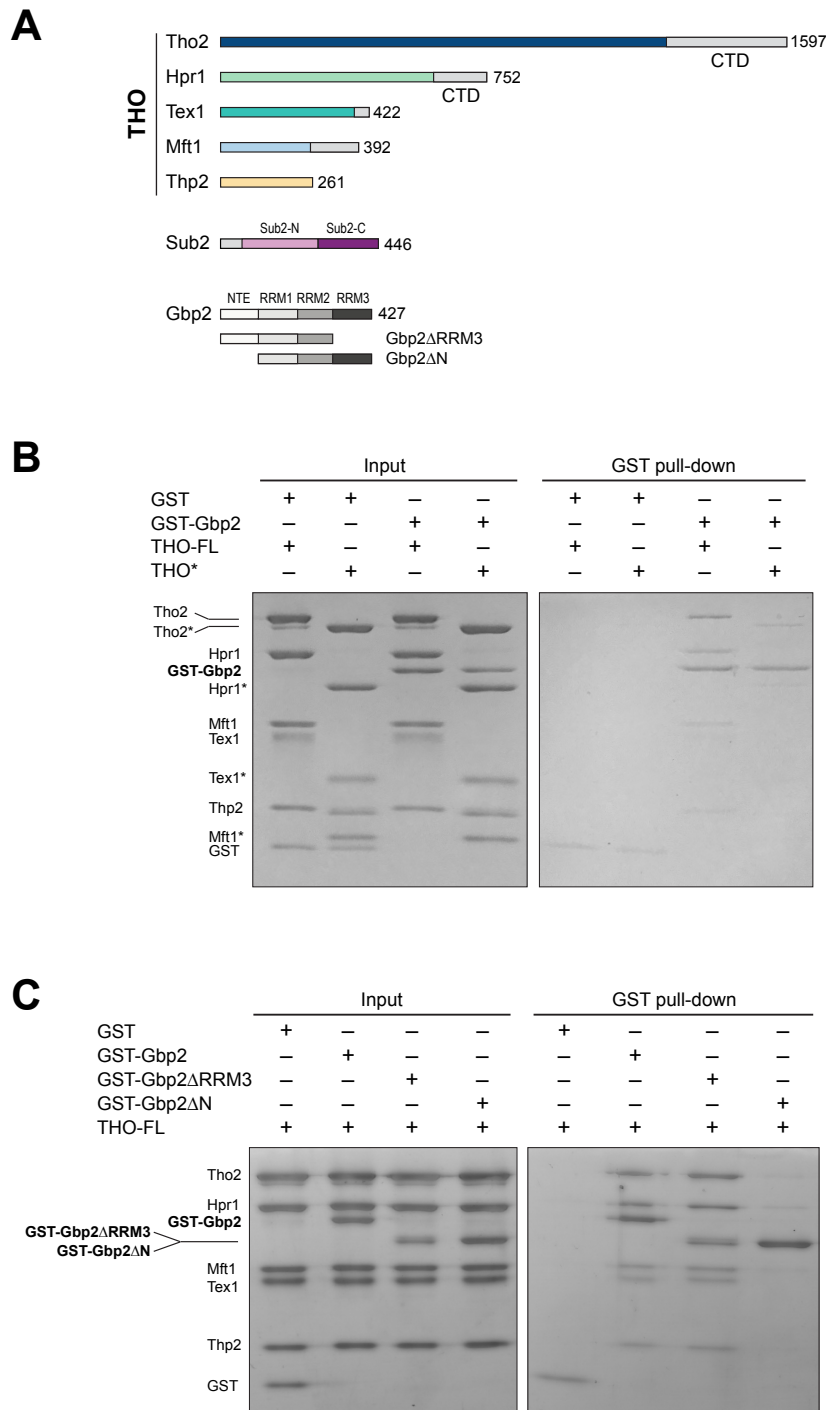

660 **Figure 1. The THO complex directly interacts with the SR-like protein Gbp2. A)**  
661 Domain organization of the THO complex, Sub2, and Gbp2. Within THO, the protein  
662 regions that are included in the core THO\* complex are colored (Tho2 in blue, Hpr1 in  
663 green, Tex1 in cyan, Mft1 in light blue, and Thp2 in yellow). Sub2 is colored in pink (Sub2-  
664 N) and purple (Sub2-C). Gbp2 contains an N-terminal extension (NTE) followed by three  
665 RRM domains. **B)** THO directly interacts with Gbp2. *In vitro* GST-pull down assays with  
666 purified recombinant proteins show that both THO-FL and THO\* bind to Gbp2 with the  
667 former exhibiting stronger interaction. **C)** THO binding to Gpb2 requires the N-terminal  
668 extension of Gbp2.

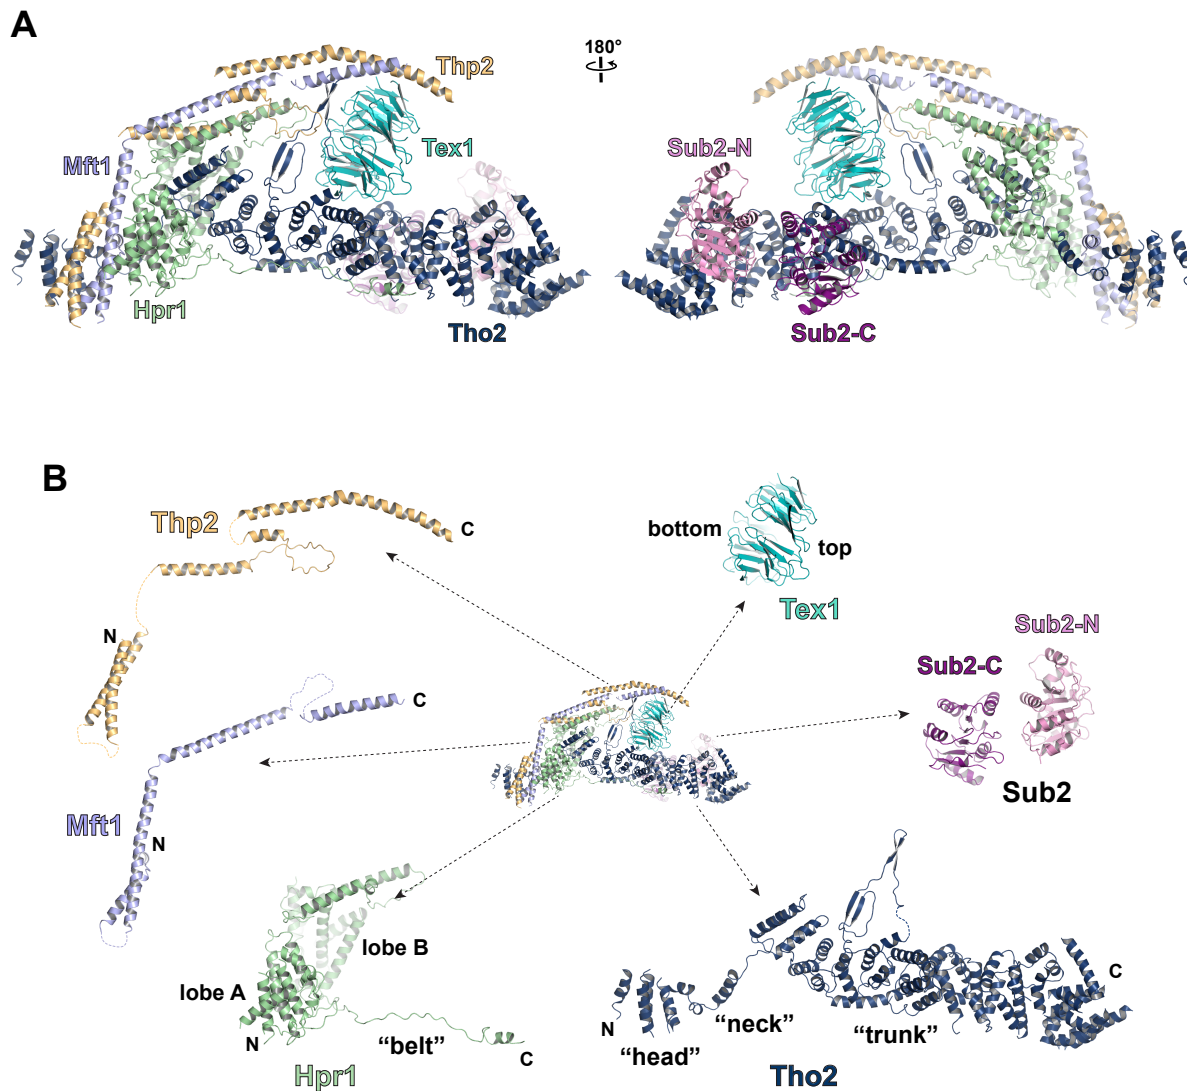

669 **Figure 2. Cryo-EM structure of the THO\*•Sub2 complex at 3.70 Å resolution. A)**  
670 **Overall architecture of the THO\*•Sub2 complex in front and back views. B) Dissected**  
671 **view of the THO\*•Sub2 complex subunits. The largest THO subunit, Tho2, contains a**  
672 **“head”, a “neck”, and an  $\alpha$ -solenoid “trunk”. Hpr1 contains lobe A, lobe B, followed by an**  
673 **extended “belt”.**

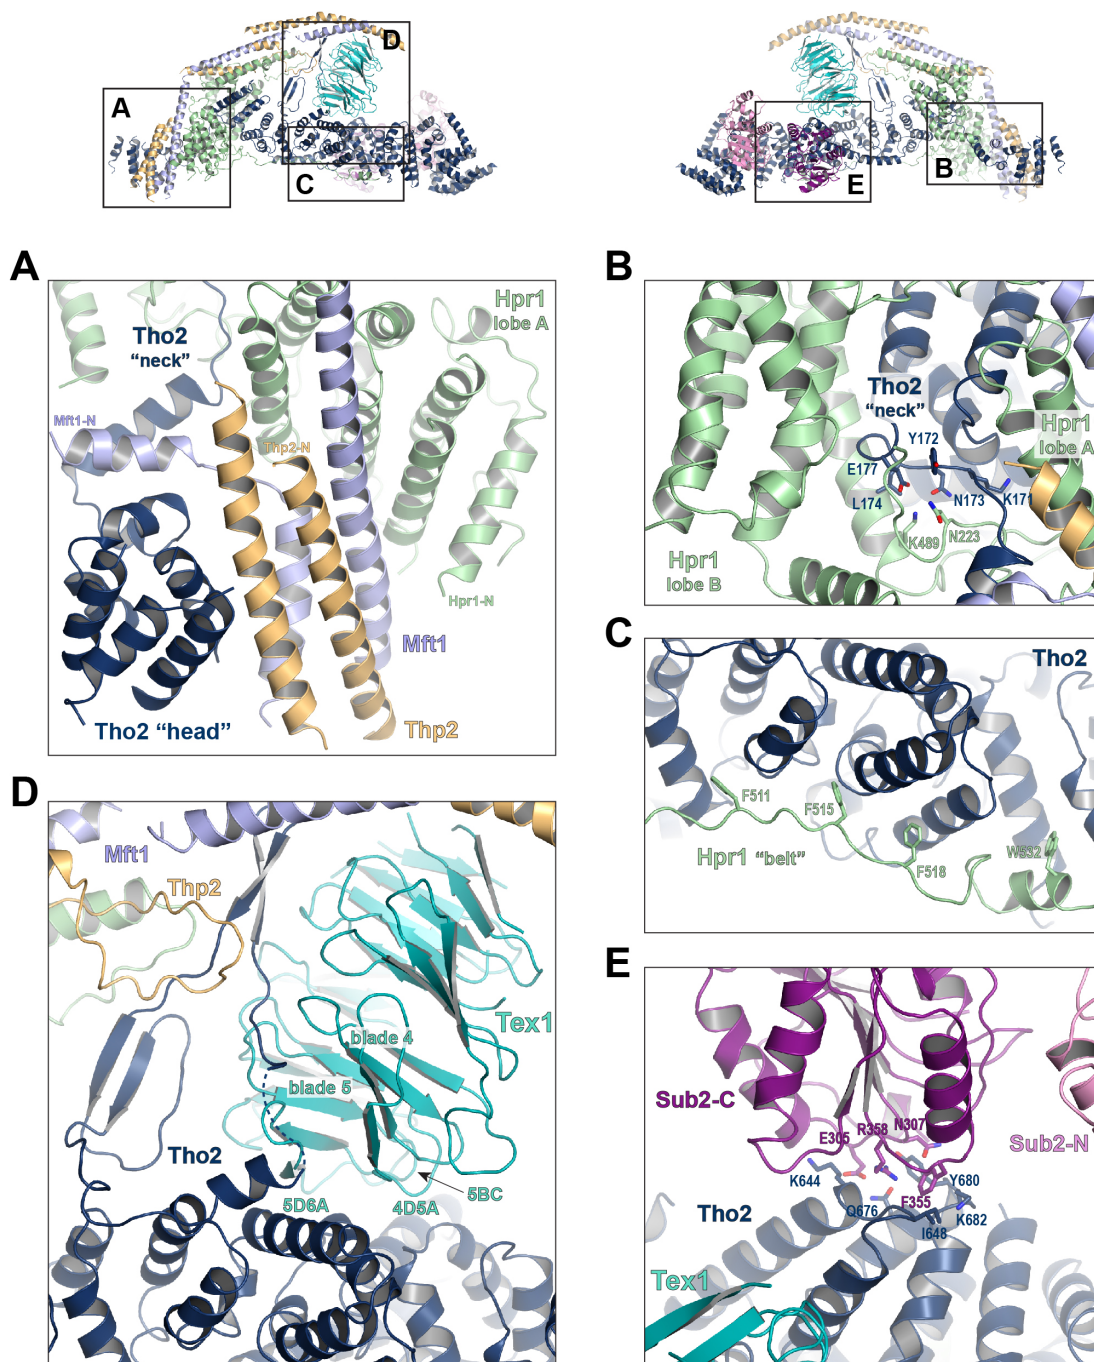

674 **Figure 3. Key interactions in the THO\*•Sub2 complex.** **A)** A highly intimate interface  
 675 involving the Tho2 “head”. **B)** The Tho2 “neck” is embraced by the two lobes of Hpr1. **C)**  
 676 The Hpr1 exhibits an extended “belt” lining the Tho2 “trunk”. **D)** The Tex1 beta propeller  
 677 sits at the center of the Tho2 “trunk”. **E)** The interface between Tho2 and Sub2-C.



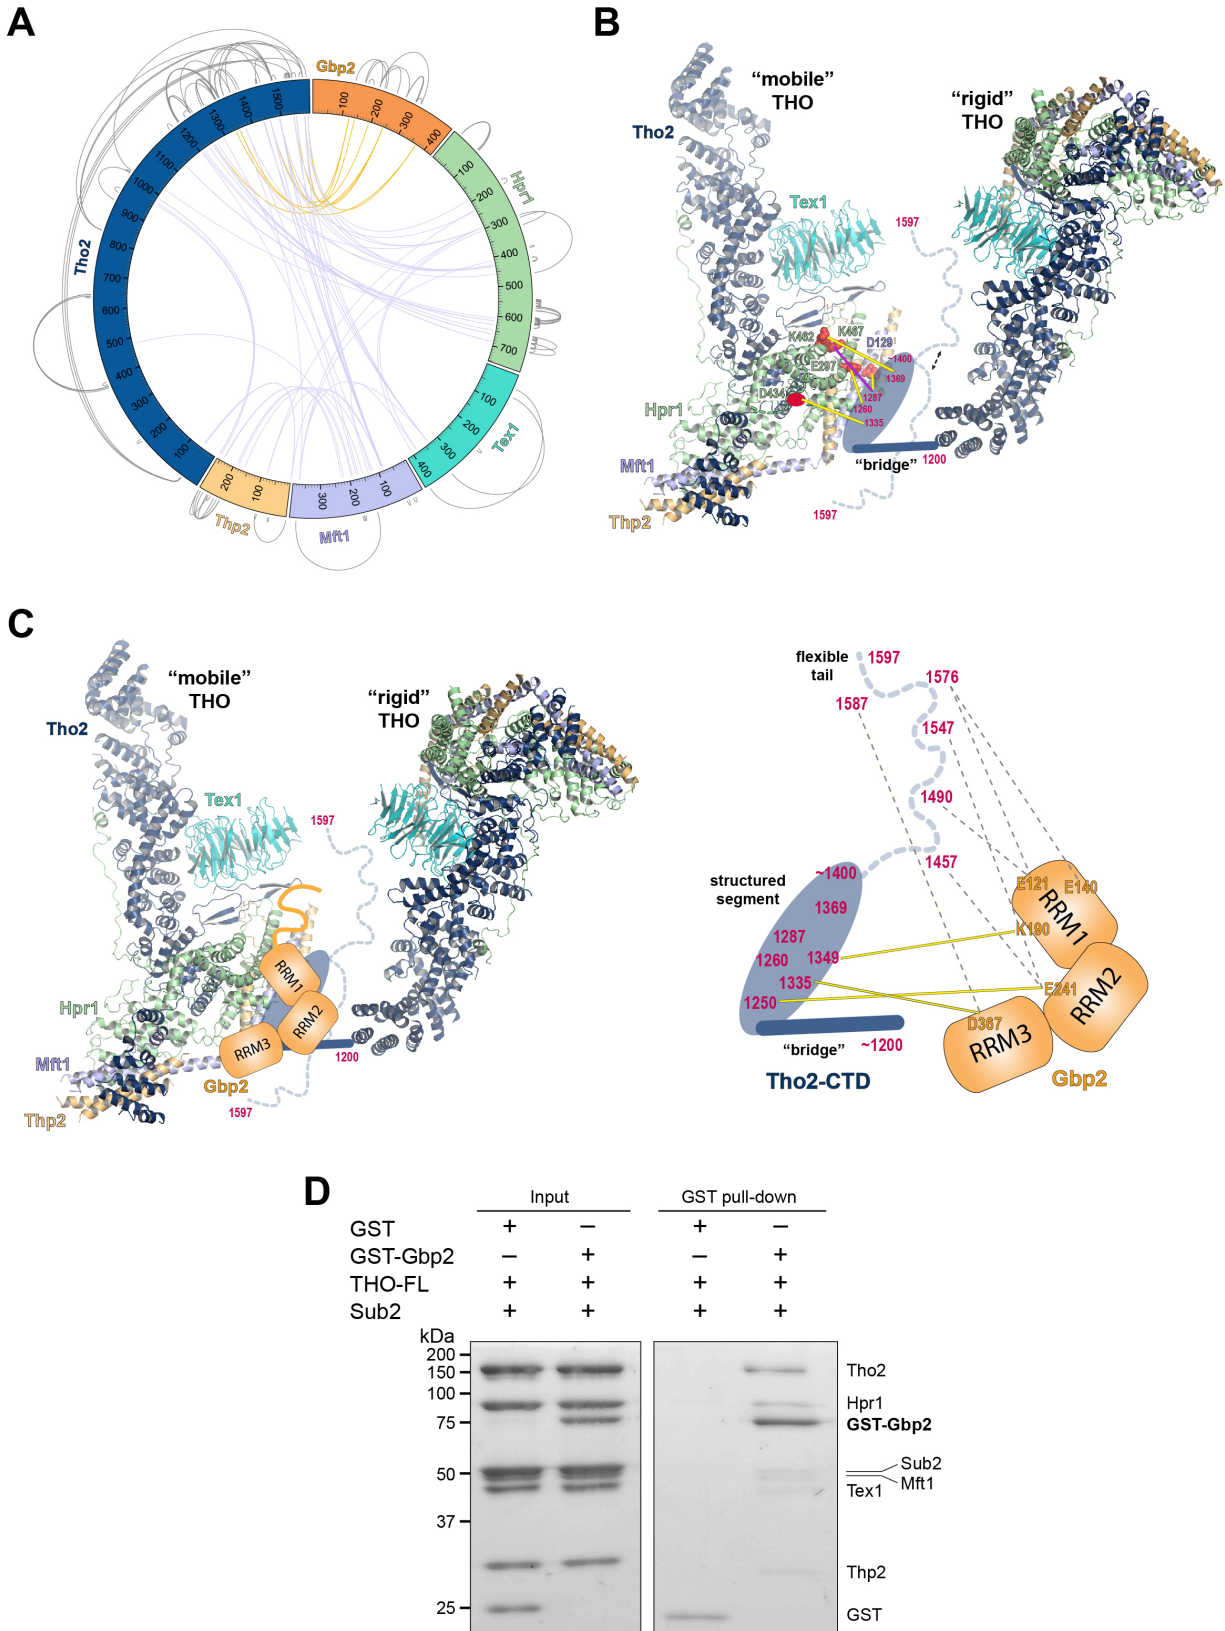

678 **Figure 4. Chemical cross-linking and mass spectrometry reveals THO-Gbp2**  
679 **interactions. A)** Circular plot showing the intermolecular crosslinking sites with EDC  
680 cross-linker. Each THO•Gbp2 complex subunit is represented as a colored segment with  
681 the amino acid residues indicated. Inter-molecular crosslinks are mapped inside the circle  
682 and the intra-molecular crosslinks are mapped outside the circle. The crosslinks between  
683 Tho2 and Gbp2 are colored in orange. **B)** Schematics of the arrangement of the Tho2-  
684 CTD, which contains a “bridge” connecting two THO molecules, followed by a structured  
685 segment and a flexible tail (residues ~1400-1597). The EDC crosslinks between the  
686 structured Tho2-CTD fragment and Hpr1 (E297, D434, and K462) as well as Mft1 (D129)  
687 are indicated by yellow lines. The DSS crosslink between Tho2-CTD and Hpr1-K467 is  
688 indicated by a purple line. **C)** Schematics of the THO-Gbp2 interactions (left) and the  
689 identified crosslinking sites between Tho2-CTD and Gbp2 RRM domains. **D)** *In vitro* GST-  
690 pull downs show that Gbp2 binds to the THO•Sub2 complex.  
691

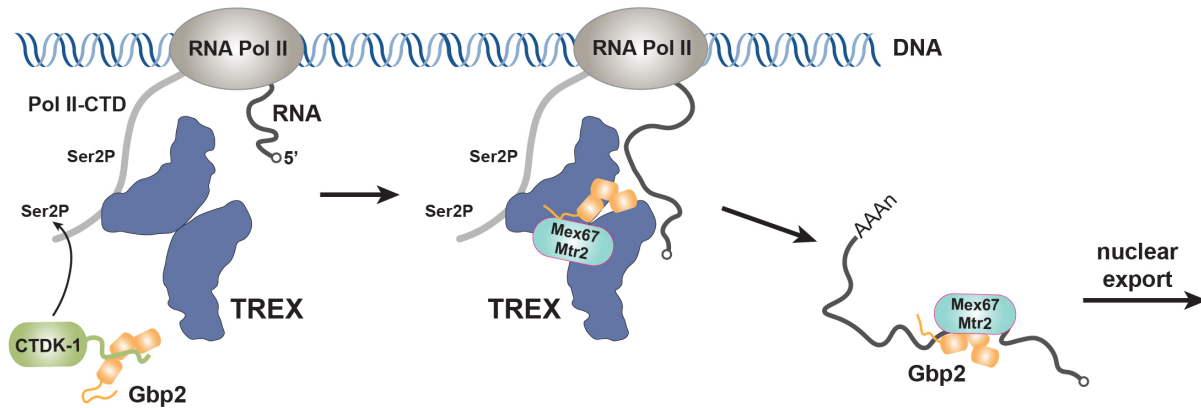

692 **Figure 5. Working model of coordinated function of TREX and Gbp2.**

693 During transcription, the yeast CTDK-1 complex phosphorylates Ser2 of the RNA Pol II  
694 CTD. The N-terminal extension in CTDK-1's kinase subunit Ctk1 recognizes the RRM  
695 domains of Gbp2, connecting Gbp2 to the transcription machinery. TREX travels along  
696 with the transcription machinery and recognizes multiple domains of Gbp2, possibly  
697 facilitating its loading onto the maturing mRNP. Both TREX and Gbp2 are involved in  
698 subsequent loading of the export receptor Mex67•Mtr2 to generate export competent  
699 mRNPs.

700



**A**

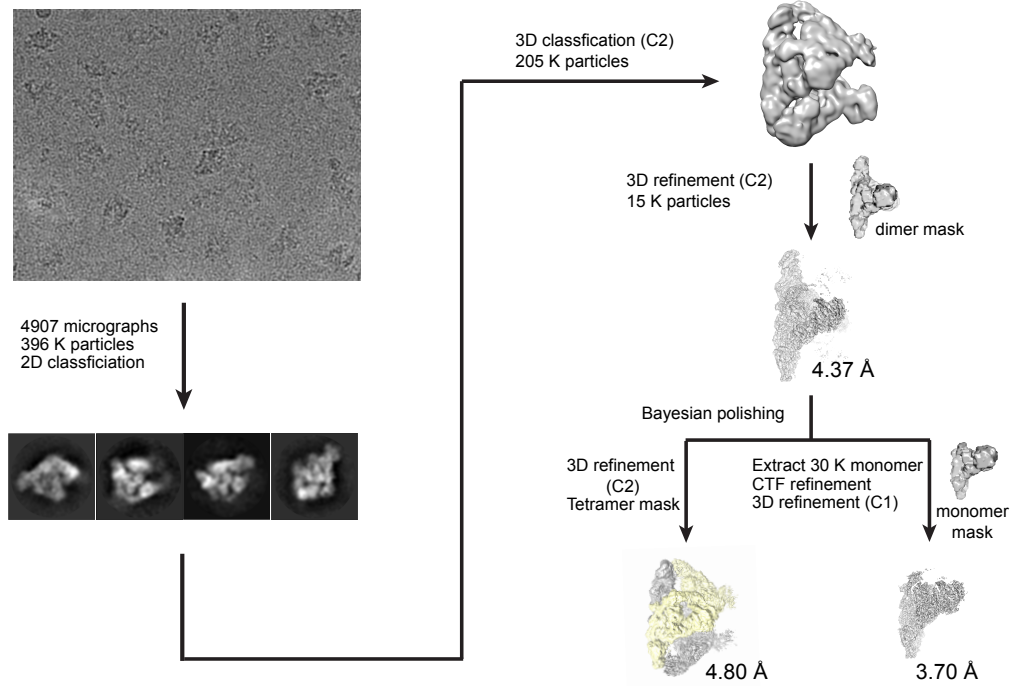

**B**

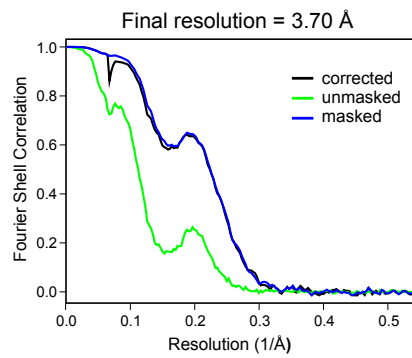

**C**

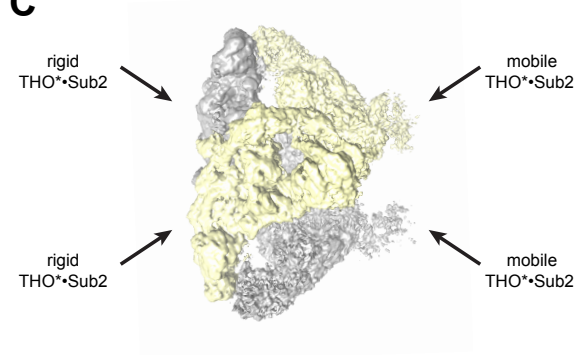

**D**

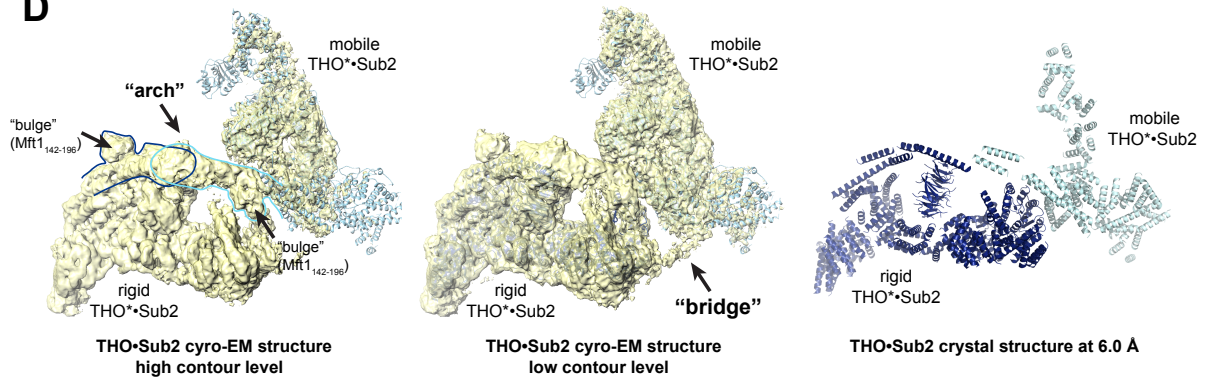

701 **Figure 2-figure supplement 1. Cryo-EM data processing. A)** Cryo-EM data processing  
702 workflow. **B)** Fourier shell correlation (FSC) curves between the two half maps of the  
703 THO\*•Sub2 protomer. **C)** Individual particles of the cryo-EM sample contain four copies  
704 of the THO\*•Sub2 protomer. **D)** An “arch” and a “bridge” are observed between a rigid  
705 THO\*•Sub2 protomer and a mobile THO\*•Sub2 protomer. Comparison of the cryo-EM  
706 map and our previous crystal structure (PDB ID 5SUQ) reveals that the crystal structure  
707 corresponds to a rigid THO\*•Sub2 protomer and partial structure of a mobile THO\*•Sub2  
708 protomer.  
709

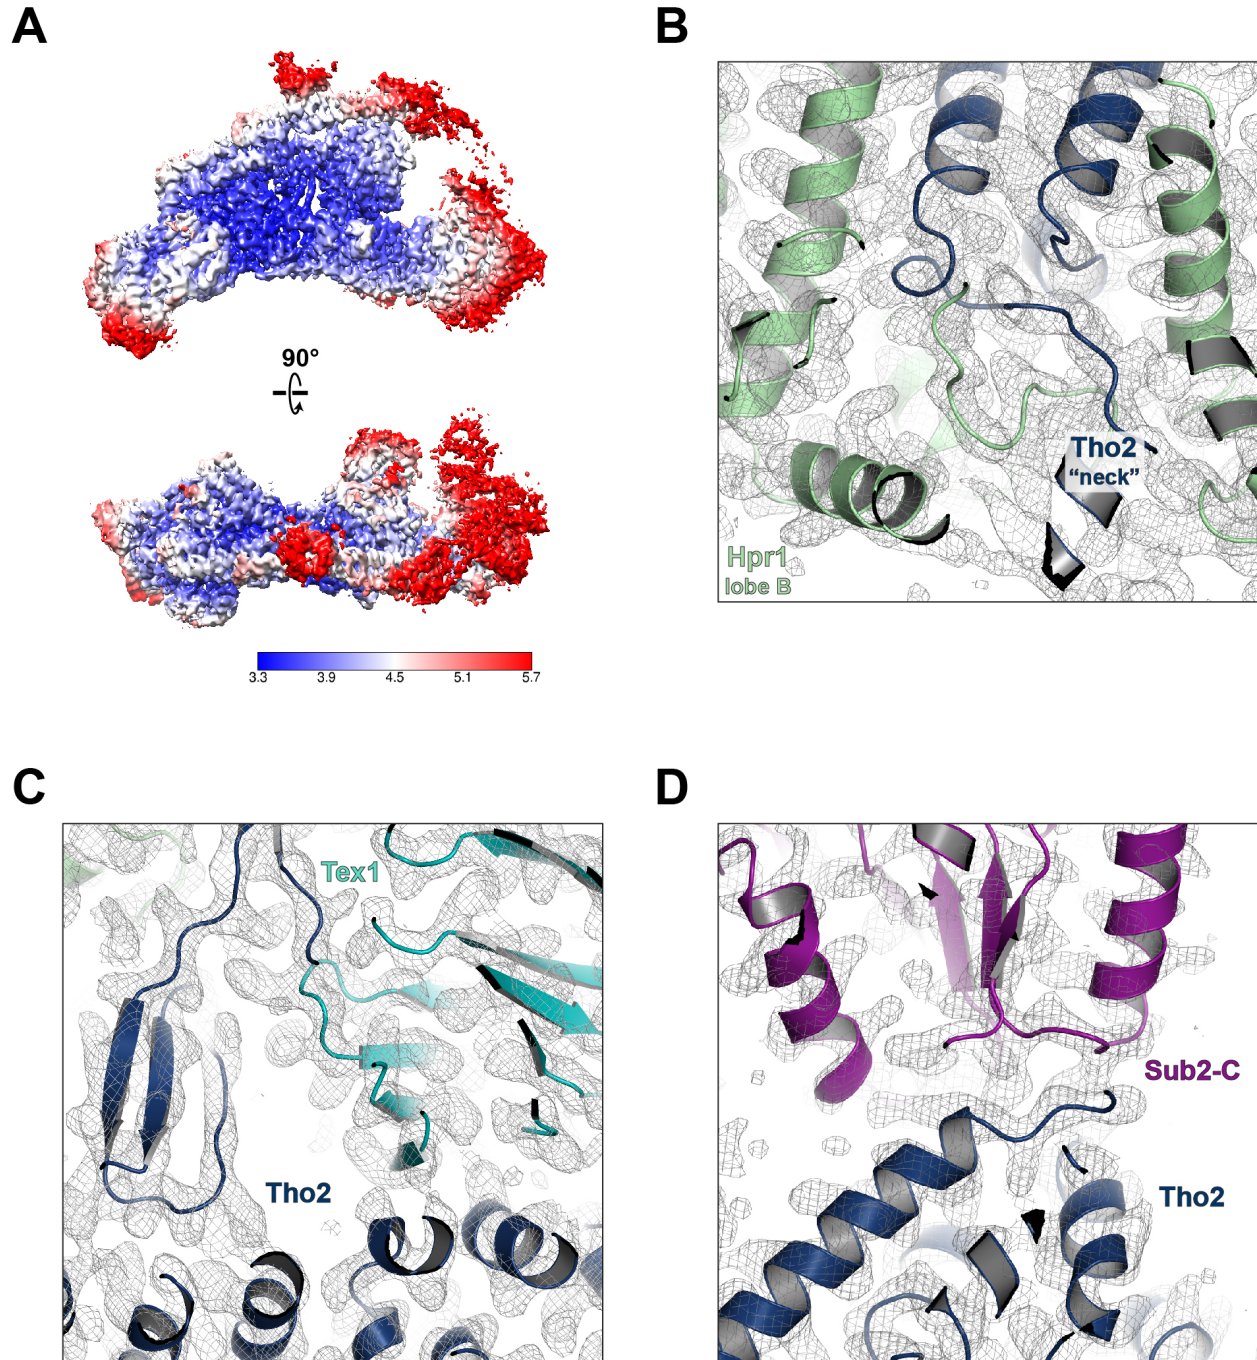

710

711 **Figure 2-figure supplement 2. Cryo-EM model building.** **A)** Local resolution of the final  
712 reconstruction calculated by Relion. Electron density maps at the Tho2 "neck" (**B**), the  
713 Tho2-Tex1 interface (**C**), and the Tho2-Sub2 interface (**D**).

714



715 **Figure 2-figure supplement 3. Sequence alignment of Tho2 homologues.**

716 Tho2 sequences from *S. cerevisiae*, *D. melanogaster*, *D. rerio*, *M. musculus*, and *H.*  
717 *sapiens* were aligned with ClustalW. Shading indicates the degree of conservation across  
718 homologues. Tho2 secondary structural features from our cryo-EM structure are shown  
719 above the sequence alignment with  $\alpha$ -helices represented as blue bars and  $\beta$ -sheets  
720 represented as blue arrows. The model of Tho2 contains ten poly-Ala helices at its C-  
721 terminus represented by gray line. Three poly-Ala helices at the N-terminus of Tho2 are  
722 represented by gray bars. Sequences that are not present in the model (loops and highly  
723 flexible regions) are represented by dotted lines. The regions of Tho2 that form interaction  
724 interfaces with each of the other THO Complex subunits were identified using PISA, and  
725 these interaction regions are shown below the sequence alignment. The coloration for the  
726 interaction regions is consistent with the color scheme throughout the manuscript with  
727 Hpr1 in green, Tex1 in cyan, Mft1 in light blue, Thp2 in yellow, Sub2-N in pink and Sub2-  
728 C in purple.

729



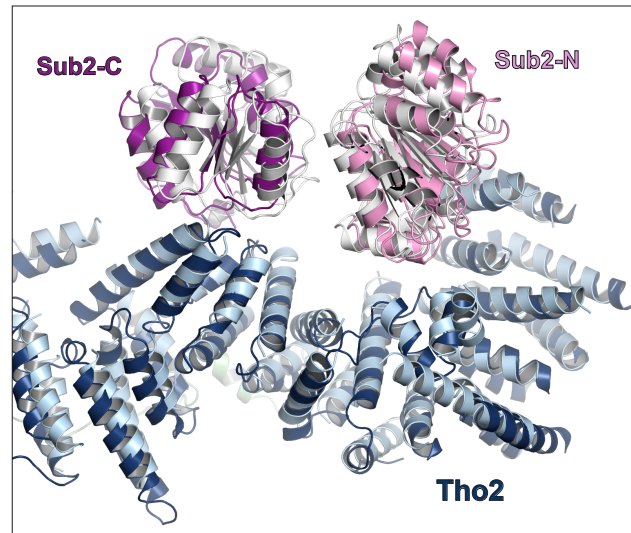

730

731 **Figure 3-figure supplement 1. Comparison of the cryo-EM structure and our**

732 **previous crystal structure of THO-Sub2 at the THO-Sub2 interface. Cryo-EM**

733 **structure is colored in blue (Tho2), pink (Sub2-N), and purple (Sub2-C). Crystal structure**

734 **is colored in light blue (Tho2) and gray (Sub2-N and Sub-C).**

735

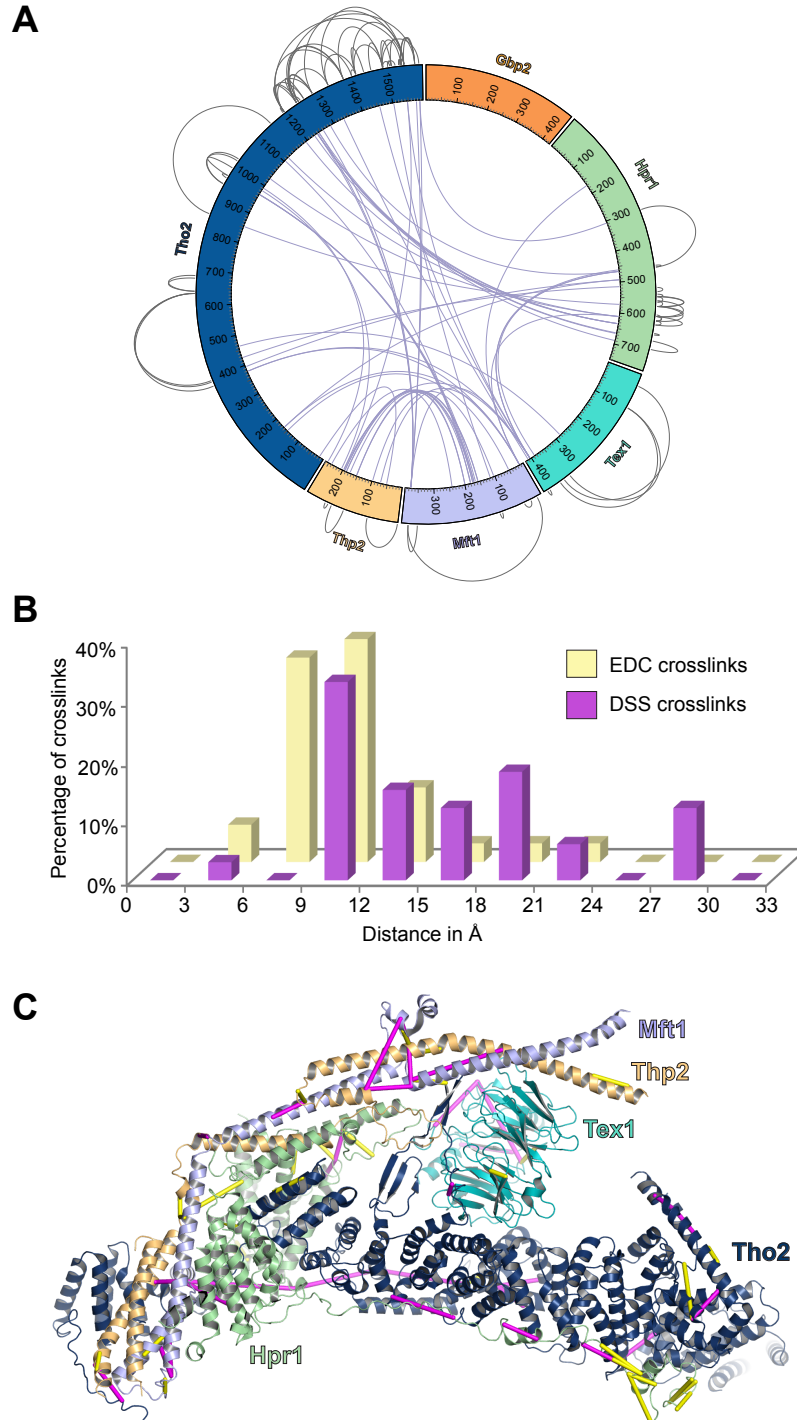

736 **Figure 4-figure supplement 1. Analyses of the XL-MS data. A)** Circular plot showing  
737 the intermolecular crosslinking sites with DSS cross-linker. **B)** Distance distribution of the  
738 crosslinks. We mapped the C $\alpha$ -C $\alpha$  distances between cross-linked residues onto the  
739 dimeric THO structure (PDB ID 7AQO). 91% of the EDC crosslinks and 100% of the DSS  
740 crosslinks that can be mapped to the structure fall within the expected threshold of 17 Å  
741 and 30 Å. **C)** EDC (yellow) and DSS (purple) crosslinks are mapped on the THO structure  
742 (PDB ID 7APX).





743 **Figure 4-figure supplement 2. XL-MS data indicate the arrangement of the C-termini**  
744 **of Tex1 and Hpr1. A)** The C-terminal tail of Tex1 (residues 367-422) is localized near  
745 Hpr1 lobe B. The crosslinking sites are indicated by yellow lines. **B)** The Hpr1-CTD binds  
746 to the C-terminus of the Tho2 “trunk” and is localized close to the neighboring THO  
747 molecule. **C)** Structural alignment of the dimeric THO assembly between our cryo-EM  
748 structure and the recently reported THO-Sub2 structure (PDB ID 7AQO). Sub2 is omitted  
749 for clarity. The structures are aligned using one THO molecule, revealing significant  
750 flexibility in the relative orientation between the two THO molecules.

**Table 1. Cryo-EM data collection, refinement and validation statistics**

|                                                  | THO-Sub2<br>protomer<br>(EMDB-xxxx)<br>(PDB xxxx) | THO-Sub2<br>tetramer<br>(EMDB-xxxx) |
|--------------------------------------------------|---------------------------------------------------|-------------------------------------|
| <b>Data collection and processing</b>            |                                                   |                                     |
| Microscope/Camera                                | Titan Krios/Falcon 3EC                            |                                     |
| Voltage (kV)                                     | 300                                               |                                     |
| Electron exposure (e-/Å <sup>2</sup> )           | 50                                                |                                     |
| Defocus range (µm)                               | 0.8 to 2.0                                        |                                     |
| Pixel size (Å)                                   | 0.681                                             |                                     |
| Symmetry imposed                                 | C1                                                |                                     |
| Initial particle images (no.)                    | 396 K                                             |                                     |
| Final particle images (no.)                      | 30 K                                              | 15 K                                |
| Resolution at 0.143 FSC (masked, Å)              | 3.70                                              | 4.80                                |
| Map sharpening <i>B</i> factor (Å <sup>2</sup> ) | 86                                                | 145                                 |
| <b>Refinement</b>                                |                                                   |                                     |
| Model resolution at 0.5 FSC (Å)                  | 3.87                                              |                                     |
| Model composition                                |                                                   |                                     |
| Protein residues                                 | 2378                                              |                                     |
| <i>B</i> factors (Å <sup>2</sup> )               |                                                   |                                     |
| Protein                                          | 109.6                                             |                                     |
| R.m.s. deviations                                |                                                   |                                     |
| Bond lengths (Å)                                 | 0.008                                             |                                     |
| Bond angles (°)                                  | 1.11                                              |                                     |
| Validation                                       |                                                   |                                     |
| MolProbity score                                 | 2.14                                              |                                     |
| Clashscore                                       | 11.86                                             |                                     |
| Poor rotamers (%)                                | 0.15                                              |                                     |
| Ramachandran plot                                |                                                   |                                     |
| Favored (%)                                      | 90.1                                              |                                     |
| Allowed (%)                                      | 9.7                                               |                                     |
| Disallowed (%)                                   | 0.2                                               |                                     |
